# Supplementary material for: Allopatric speciation in cattails: Genomics reveal bottlenecks, balancing selection, and adaptive introgressions in Typha, a wetland ecosystem engineer
Source: Research Square preprint supplement (doi:10.21203/rs.3.rs-6778557/v1), 2025-06-04
Supplement: Supplementary file 1 [file b19647f596713817327e2967.docx]

***Supplementary information – Methods***

*DNA Extraction*

Leaf tissue was dried in desiccant silica beads and stored at -20 °C. Dried leaf material was ground with a Retsch® MM300 mixer mill (Haan, Germany). We used 25–30 mg of semi-fine powder from each sample with the EZNA Plant DNA kit (Omega-BioTek) or the Fastpure Plant DNA Isolation Mini Kit (Nanjing Vazyme Biotech, China) protocols for dried material, with a final elution volume of 100 μL.

*Nextera XT libraries*

DNA was quantified using a Qubit fluorometer (Thermo Fisher Scientific) and calculated as the mean of three independent readings for each sample. All samples were either standardised to 2 ng/μL by dilution with nuclease-free water or left undiluted if their concentrations were less than 2 ng/μL (0.4–1.9 ng/μL). Each sample was tagmented with the Illumina Tagment DNA enzyme (TD) and buffer kit (small kit, #20034210). The reagent volumes for the library preparation were 5.5 μL of 5*×* TD buffer, 0.5 μL of 1*×* TD enzyme, and 4 μL of DNA (standardised or undiluted), with all reagents kept on ice during preparation. Samples were incubated at 55 °C for 10 minutes and then allowed to cool to room temperature for 5 minutes. Subsequently, 5 μL of each sample was run on an agarose gel to confirm the efficacy of the tagmentation reaction, as evidenced by the presence of visible smears. The tagmented DNA was then amplified using unique dual indexing based on combinations from a total of 24 N7 (47 bases) and 8 S5 (51 bases) adapters (Alpha DNA, Canada). The PCR cocktail included 0.2 µM of each index, 0.5 U of KAPA HiFi HotStart DNA polymerase (Roche), 12.5 μL of 5*×* KAPA reagent, 5 μL of tagmented DNA, and 6.5 μL of nuclease-free water to a final volume of 25 μL. The PCR cycle consisted of 72 °C (3 minutes), 95 °C (30 seconds), and 14 cycles of 95 °C (10 seconds), 55 °C (30 seconds), and 72 °C (30 seconds). Again, visible smears confirmed amplification success after running 5 μL of the PCR product on an agarose gel; then, 10 μL of each sample was pooled, and the remaining PCR products were stored at -20 °C. The pooled library was purified using a QIAquick PCR purification kit (QIAGEN) according to the manufacturer's protocol, with a final elution in 50 μL of elution buffer. The library was quantified using a D1000 Tapestation assay (Agilent Technologies, USA) and a Qubit fluorometer (Thermo Fisher Scientific).

**Supplementary Table S1.** Sampling identifiers, geographic coordinates, and species memberships of the samples collected in this study.

| Sampling ID | Latitude (approximate) | Longitude (approximate) | Species |
| --- | --- | --- | --- |
| BHP1 | 50.79 | -119.21 | *T. latifolia* |
| BJL2 | 50.57 | -119.61 | *T. latifolia* |
| BJL3_1 | 50.57 | -119.61 | *T. latifolia* |
| BRT2B | 44.74 | -63.24 | *T. angustifolia* |
| BUN1 | 53.89 | -122.81 | *T. latifolia* |
| C05TL | 52.72 | -1.37 | *T. latifolia* |
| CA13_TL | 44.85 | 7.71 | *T. latifolia* |
| CA3TL | 47.68 | 22.46 | *T. latifolia* |
| CC1_TL | 50.77 | 2.31 | *T. latifolia* |
| CC2_TL | 50.77 | 2.31 | *T. latifolia* |
| CIUU13TA | 43.76 | 24.93 | *T. angustifolia* |
| CL10TA | 50.77 | 2.31 | *T. angustifolia* |
| COTL6 | 52.72 | -1.37 | *T. latifolia* |
| CRR6 | 47.68 | 22.46 | *T. angustifolia* |
| CS3_TA | 44.08 | 4.79 | *T. laxmannii* |
| CY1ATL | 52.16 | 4.50 | *T. latifolia* |
| CY6ATA | 51.43 | -0.11 | *T. angustifolia* |
| CY7ATA | 51.43 | -0.11 | *T. angustifolia* |
| CY7BTA | 51.43 | -0.11 | *T. angustifolia* |
| CYTZ_4ATD | -6.79 | 39.21 | *T. domingensis* |
| DAB16TA | 48.20 | 26.59 | *T. angustifolia* |
| E74B | 45.03 | -63.50 | *T. angustifolia* |
| E91C | 45.03 | -63.50 | *T. angustifolia* |
| EDD_44_1 | 47.37 | -68.33 | *T. latifolia* |
| EDD_67_1 | 47.37 | -68.33 | *T. latifolia* |
| EDW_2_15 | 47.37 | -68.33 | *T. latifolia* |
| EDW_3_6 | 47.37 | -68.33 | *T. latifolia* |
| EL14_TA | 52.44 | 5.85 | *T. latifolia* |
| ELTA_01 | 52.44 | 5.85 | *T. angustifolia* |
| ELTA_08 | 52.44 | 5.85 | *T. angustifolia* |
| FRD47_2 | 45.96 | -66.64 | *T. latifolia* |
| FRTD_1 | 41.64 | 13.34 | *T. domingensis* |
| GORE_3 | 43.68 | -70.44 | *T. latifolia* |
| G_II3 | 49.11 | 11.93 | *T. latifolia* |
| HAD_3_1 | 44.60 | -63.55 | *T. angustifolia* |
| HAW_03_12 | 44.60 | -63.55 | *T. latifolia* |
| HAW_10_9 | 44.60 | -63.55 | *T. latifolia* |
| HM3TL | 47.51 | 19.04 | *T. latifolia* |
| HMTM1 | 47.51 | 19.04 | *T. laxmannii* |
| HOR_6 | 48.14 | 26.51 | *T. latifolia* |
| HUF_13TA | 47.69 | 17.65 | *T. angustifolia* |
| HUG_13TA | 47.69 | 17.65 | *T. angustifolia* |
| HUS_10TL | 47.51 | 19.04 | *T. latifolia* |
| HUS_TA1 | 47.51 | 19.04 | *T. angustifolia* |
| HUS_TL1 | 47.51 | 19.04 | *T. latifolia* |
| IC17TA | 43.57 | 4.32 | *T. angustifolia* |
| ICTD5 | 43.57 | 4.32 | *T. angustifolia* |
| IP2 | 44.46 | -64.32 | *T. latifolia* |
| IR_25 | 44.97 | -64.06 | *T. latifolia* |
| IR_36 | 44.97 | -64.06 | *T. latifolia* |
| IR_39 | 44.97 | -64.06 | *T. latifolia* |
| IR_41 | 44.97 | -64.06 | *T. latifolia* |
| KL14_TL | 46.64 | 14.31 | *T. latifolia* |
| KL1TL | 46.64 | 14.31 | *T. latifolia* |
| KL28_TL | 46.64 | 14.31 | *T. latifolia* |
| KL4_TA | 46.64 | 14.31 | *T. laxmannii* |
| KL5_TX | 46.64 | 14.31 | *T. laxmannii* |
| KL_TA1 | 46.64 | 14.31 | *T. laxmannii* |
| KL_TA3 | 46.64 | 14.31 | *T. laxmannii* |
| KL_TH1 | 46.64 | 14.31 | *T. latifolia* |
| LIETD_01 | 42.21 | 2.61 | *T. domingensis* |
| LIETD_12 | 42.21 | 2.61 | *T. domingensis* |
| LiETL_11 | 42.21 | 2.61 | *T. latifolia* |
| M23 | 45.08 | -64.49 | *T. latifolia* |
| M30 | 45.08 | -64.49 | *T. latifolia* |
| M37 | 45.08 | -64.49 | *T. latifolia* |
| M53 | 45.08 | -64.49 | *T. latifolia* |
| M85 | 45.08 | -64.49 | *T. latifolia* |
| MBNK_2_8 | 51.51 | -97.00 | *T. latifolia* |
| MOD_01_0 | 46.98 | -70.55 | *T. latifolia* |
| MOD_02_1 | 46.98 | -70.55 | *T. latifolia* |
| MOD_04_1 | 46.98 | -70.55 | *T. latifolia* |
| MOD_05_2 | 46.98 | -70.55 | *T. latifolia* |
| MOD_07_0 | 46.98 | -70.55 | *T. angustifolia* |
| MOD_08_1 | 46.98 | -70.55 | *T. latifolia* |
| MOD_14_0 | 46.98 | -70.55 | *T. latifolia* |
| MOD_14_3 | 46.98 | -70.55 | *T. angustifolia* |
| MOD_15_1 | 46.98 | -70.55 | *T. latifolia* |
| MOD_16_1 | 46.98 | -70.55 | *T. latifolia* |
| MOD_17_1 | 46.98 | -70.55 | *T. latifolia* |
| MOD_18_0 | 46.98 | -70.55 | *T. latifolia* |
| MOD_25_2 | 46.98 | -70.55 | *T. latifolia* |
| MOD_26_2 | 46.98 | -70.55 | *T. latifolia* |
| MOD_29_1 | 46.98 | -70.55 | *T. latifolia* |
| MOD_35_3 | 46.98 | -70.55 | *T. latifolia* |
| MOD_45_2 | 46.98 | -70.55 | *T. latifolia* |
| MOD_47_1 | 46.98 | -70.55 | *T. angustifolia* |
| MOD_54_0 | 46.98 | -70.55 | *T. latifolia* |
| MOD_56_1 | 46.98 | -70.55 | *T. angustifolia* |
| MOD_57_0 | 46.98 | -70.55 | *T. latifolia* |
| NBU_6 | 42.53 | 2.83 | *T. domingensis* |
| ORP_TI | 43.28 | -2.13 | *T. latifolia* |
| OR_TA4 | 43.28 | -2.13 | *T. domingensis* |
| OR_TI2 | 43.28 | -2.13 | *T. latifolia* |
| OR_TL5 | 43.28 | -2.13 | *T. latifolia* |
| P4 | 45.41 | -64.33 | *T. latifolia* |
| P6 | 45.41 | -64.33 | *T. latifolia* |
| P9 | 45.41 | -64.33 | *T. latifolia* |
| PA2 | 33.19 | -112.15 | *T. domingensis* |
| PIW_01_0 | 43.84 | -79.10 | *T. angustifolia* |
| PIW_04_6 | 43.84 | -79.10 | *T. angustifolia* |
| PIW_06_6 | 43.84 | -79.10 | *T. angustifolia* |
| PIW_07_1 | 43.84 | -79.10 | *T. angustifolia* |
| PIW_09_1 | 43.84 | -79.10 | *T. angustifolia* |
| PIW_10_2 | 43.84 | -79.10 | *T. angustifolia* |
| PIW_13_0 | 43.84 | -79.10 | *T. angustifolia* |
| PIW_14_3 | 43.84 | -79.10 | *T. angustifolia* |
| PIW_15_3 | 43.84 | -79.10 | *T. angustifolia* |
| PIW_16_2 | 43.84 | -79.10 | *T. angustifolia* |
| PIW_20_6 | 43.84 | -79.10 | *T. angustifolia* |
| PIW_21_3 | 43.84 | -79.10 | *T. angustifolia* |
| PIW_22_6 | 43.84 | -79.10 | *T. angustifolia* |
| PIW_23_3 | 43.84 | -79.10 | *T. angustifolia* |
| PIW_24_3 | 43.84 | -79.10 | *T. angustifolia* |
| PIW_25_3 | 43.84 | -79.10 | *T. angustifolia* |
| PWE19TL | 51.62 | -3.94 | *T. latifolia* |
| RGT2 | 45.48 | -74.30 | *T. angustifolia* |
| SADT_03 | 45.90 | -64.39 | *T. angustifolia* |
| SAD_10_3 | 45.90 | -64.39 | *T. latifolia* |
| SAD_17_3 | 45.90 | -64.39 | *T. latifolia* |
| SAD_25_0 | 45.90 | -64.39 | *T. latifolia* |
| SCH9TA | 47.65 | 26.22 | *T. latifolia* |
| SP2_TA | 52.41 | 4.68 | *T. angustifolia* |
| TAKT_1 | 45.27 | 37.38 | *T. angustifolia* |
| TAKT_2 | 45.27 | 37.38 | *T. angustifolia* |
| TALD_1 | 55.73 | 37.61 | *T. angustifolia* |
| TAVG_1 | 55.32 | 40.37 | *T. angustifolia* |
| TAVG_2 | 55.32 | 40.37 | *T. angustifolia* |
| TA_01_F | 26.56 | -81.95 | *T. latifolia* |
| TB7 | 44.39 | -64.25 | *T. latifolia* |
| TDD_04 | 43.09 | 47.46 | *T. domingensis* |
| TDD_08 | 43.09 | 47.46 | *T. domingensis* |
| TDD_09 | 43.09 | 47.46 | *T. domingensis* |
| TDD_15 | 43.09 | 47.46 | *T. domingensis* |
| TDD_16 | 43.09 | 47.46 | *T. latifolia* |
| TDD_17 | 43.09 | 47.46 | *T. latifolia* |
| TDD_18 | 43.09 | 47.46 | *T. domingensis* |
| TDD_22 | 43.09 | 47.46 | *T. domingensis* |
| TDD_30 | 43.09 | 47.46 | *T. domingensis* |
| TDD_32 | 43.09 | 47.46 | *T. domingensis* |
| TDD_33 | 43.09 | 47.46 | *T. domingensis* |
| TDD_35 | 43.09 | 47.46 | *T. latifolia* |
| TDD_36 | 43.09 | 47.46 | *T. latifolia* |
| TDD_37 | 43.09 | 47.46 | *T. latifolia* |
| TDD_39 | 43.09 | 47.46 | *T. latifolia* |
| TDD_40 | 43.09 | 47.46 | *T. domingensis* |
| TDD_41 | 43.09 | 47.46 | *T. latifolia* |
| TDD_42 | 43.09 | 47.46 | *T. latifolia* |
| TDD_43 | 43.09 | 47.46 | *T. angustifolia* |
| TDD_44 | 43.09 | 47.46 | *T. domingensis* |
| TDD_46 | 43.09 | 47.46 | *T. domingensis* |
| TDD_47 | 43.09 | 47.46 | *T. domingensis* |
| TDD_49 | 43.09 | 47.46 | *T. angustifolia* |
| TDD_50 | 43.09 | 47.46 | *T. domingensis* |
| TDD_51 | 43.09 | 47.46 | *T. domingensis* |
| TDD_52 | 43.09 | 47.46 | *T. domingensis* |
| TDD_53 | 43.09 | 47.46 | *T. domingensis* |
| TDD_54 | 43.09 | 47.46 | *T. domingensis* |
| TLAX_1 | 43.35 | 47.24 | *T. laxmannii* |
| TLAX_2 | 43.35 | 47.24 | *T. laxmannii* |
| TLAX_6 | 41.63 | 48.35 | *T. laxmannii* |
| TLAX_7 | 41.63 | 48.35 | *T. laxmannii* |
| TLIK_01 | 45.09 | 147.89 | *T. latifolia* |
| TLIK_02 | 45.09 | 147.89 | *T. latifolia* |
| TLIK_03 | 45.09 | 147.89 | *T. latifolia* |
| TLIK_04 | 45.09 | 147.89 | *T. latifolia* |
| TLIK_06 | 45.09 | 147.89 | *T. latifolia* |
| TLIK_11 | 45.09 | 147.89 | *T. latifolia* |
| TLIK_14 | 45.09 | 147.89 | *T. latifolia* |
| TLIK_15 | 45.09 | 147.89 | *T. latifolia* |
| TLIK_16 | 45.09 | 147.89 | *T. latifolia* |
| TLIK_24 | 45.09 | 147.89 | *T. latifolia* |
| TLKL_2 | 45.23 | 39.07 | *T. laxmannii* |
| TLMK_1 | 45.21 | 38.89 | *T. latifolia* |
| TLMK_2 | 45.21 | 38.89 | *T. latifolia* |
| TLPK_1 | 45.09 | 147.89 | *T. latifolia* |
| TLSK_01 | 47.06 | 142.53 | *T. latifolia* |
| TLSK_02 | 47.06 | 142.53 | *T. latifolia* |
| TLSK_03 | 47.06 | 142.53 | *T. latifolia* |
| TLSK_04 | 47.06 | 142.53 | *T. latifolia* |
| TLSK_11 | 47.06 | 142.53 | *T. latifolia* |
| TLSK_12 | 47.06 | 142.53 | *T. latifolia* |
| TMO2_7 | 46.09 | -64.78 | *T. latifolia* |
| TSKL_1 | 43.85 | 39.71 | *T. shuttleworthii* |
| TSKL_2 | 43.85 | 39.71 | *T. shuttleworthii* |
| TSKL_3 | 43.85 | 39.71 | *T. shuttleworthii* |
| TXKT_1 | 45.29 | 37.41 | *T. angustifolia* |
| TXKT_2 | 45.29 | 37.41 | *T. angustifolia* |
| TXKT_3 | 45.29 | 37.41 | *T. angustifolia* |
| TXKT_4 | 45.29 | 37.41 | *T. angustifolia* |
| TXKT_6 | 45.29 | 37.41 | *T. angustifolia* |
| TXVG_1 | 55.32 | 40.37 | *T. angustifolia* |
| TXVG_2 | 55.32 | 40.37 | *T. angustifolia* |
| VFW6 | 49.63 | -125.40 | *T. latifolia* |
| Vikram_25 | 44.30 | -78.32 | *T. angustifolia* |
| Vikram_33 | 44.30 | -78.32 | *T. angustifolia* |
| Vikram_73 | 44.30 | -78.32 | *T. angustifolia* |
| Vikram_76 | 44.30 | -78.32 | *T. latifolia* |
| Vikram_86 | 44.30 | -78.32 | *T. latifolia* |
| Vikram_94 | 44.30 | -78.32 | *T. angustifolia* |
| Vikram_95 | 44.30 | -78.32 | *T. latifolia* |
| WBD20_1 | 44.28 | -84.23 | *T. angustifolia* |
| WBD_27_4 | 44.28 | -84.23 | *T. angustifolia* |
| WBD_28_3 | 44.28 | -84.23 | *T. angustifolia* |
| WBD_32_1 | 44.28 | -84.23 | *T. angustifolia* |
| WBD_33_1 | 44.28 | -84.23 | *T. angustifolia* |
| WBW5_4 | 44.28 | -84.23 | *T. latifolia* |

**Supplementary Table S2.** Combinations of ingroup-outgroup (P1) recipient (P2), and donor species (P3) used during the ABBA BABA test to look for introgressive hybridisation between four *Typha* spp.; *T. laxmannii* was established as the outgroup species for all comparisons.

| P1 | P2 | P3 |
| --- | --- | --- |
| *T. angustifolia* | *T. domingensis* | *T. latifolia* |
| *T. angustifolia* | *T. domingensis* | *T. shuttleworthii* |
| *T. domingensis* | *T. angustifolia* | *T. latifolia* |
| *T. domingensis* | *T. angustifolia* | *T. shuttleworthii* |
| *T. shuttleworthii* | *T. latifolia* | *T. angustifolia* |
| *T. shuttleworthii* | *T. latifolia* | *T. domingensis* |

**
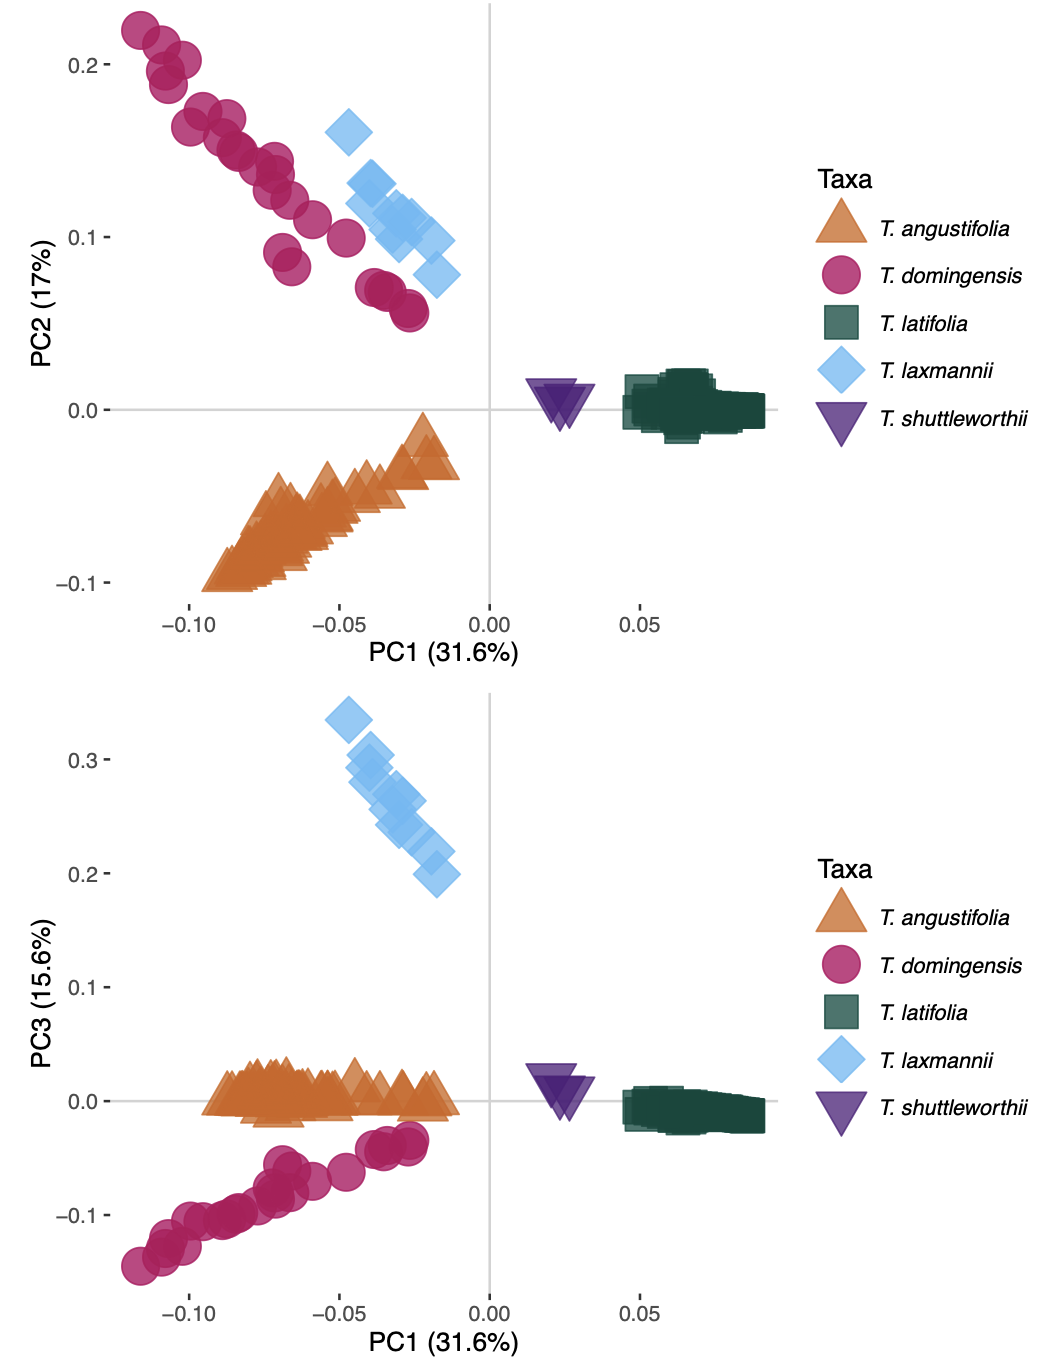
**

**Supplementary Figure S1.** Principal component analysis for PC1-PC2 and PC1-PC3.Individual shapes represent individuals, and shape forms and colour codes represent species, as in the box.

**Supplementary Figures S3-S12 (Zip file).** Genomic landscapes of divergence between five *Typha* species. Results from *Role of selection and introgressive hybridisation on species’ divergence*. Islands and valleys of divergence (5 kb) consistent with alternative types of selection are coloured according to the legend.

**Supplementary Figures S13-S14 (Zip file).** Genomic landscapes of divergence between *Typha angustifolia* and *T. latifolia* split by continent (North America and Europe). Islands and valleys of divergence (5 kb) consistent with alternative types of selection are coloured according to the legend.
